# Supplementary material for: Rehab on Wheels: A Pilot Study of Tablet-Based Wheelchair Training for Older Adults
Source: PubMed Central journal article supplement (PMC5454553; doi:10.2196/rehab.4274), 2015-04-30
Supplement: rehab_v2i1e3_app1.pdf [file rehab_v2i1e3_app1.pdf]

### Data for administration of the study components

| Event Interval | Evaluation Metric | Participant 1 | Participant 2 | Outcome   |
|----------------|-------------------|---------------|---------------|-----------|
| D1 – T1        | ≤ 7 days          | 5             | 6             | Confirmed |
| T1 – T2        | 14 ± 2 days       | 14            | 13            | Confirmed |
| T1 – D2        | 28 - 35 days      | 28            | 29            | Confirmed |
| D1 – D2        | ≤ 42 days         | 33            | 35            | Confirmed |

### Data for administration of the data collection procedures

| Component                                      | Evaluation Strategy                                                      | Evaluation Metric                                                    | Outcome                |
|------------------------------------------------|--------------------------------------------------------------------------|----------------------------------------------------------------------|------------------------|
| Administration consistent with protocol binder | D <sub>1</sub> and D <sub>2</sub> video recorded; reviewed within 3 days | Any errors or issues noted and addressed or protocol revised         | Confirmed              |
|                                                | Protocol checklist                                                       | All items completed and checked                                      | Confirmed              |
| Administration of outcome measures             | Measures re-scored by PI via video recording                             | Errors or issues noted; addressed with tester or additional training | Confirmed              |
| Administration burden                          | Tester documented time to administer; PI confirmed via video recording   | D <sub>1</sub> : 120 ± 10 min<br>P1 = 122 min; P2 = 114 min          | Confirmed <sup>a</sup> |
|                                                |                                                                          | D <sub>2</sub> : 60 ± 10 min<br>P1 = 51 min; P2 = 69 min             |                        |

<sup>a</sup> Modification made to the D1 protocol to administer the primary outcome (WST) once, rather than twice, to reduce burden and administration time.

### Data for administration of the in-person training procedures

| Component                                      | Evaluation Strategy                                                                                                                               | Evaluation Metric                                                                                                                     | Outcome   |
|------------------------------------------------|---------------------------------------------------------------------------------------------------------------------------------------------------|---------------------------------------------------------------------------------------------------------------------------------------|-----------|
| Administration consistent with protocol binder | T <sub>1</sub> and T <sub>2</sub> video recorded; reviewed within 3 days                                                                          | Any errors or issues noted and addressed or protocol revised                                                                          | Confirmed |
|                                                | Protocol checklist                                                                                                                                | All items checked and completed                                                                                                       | Confirmed |
|                                                | Breaks from protocol                                                                                                                              | No breaks, else protocol revision                                                                                                     | Confirmed |
| Administration burden                          | Trainer documented time to administer; PI confirmed via video recording                                                                           | T <sub>1</sub> : within 120 ± 10 min<br>P1 = 123 min; P2 = 101 min<br>T <sub>2</sub> : within 60 ± 10 min<br>P1 = 60 min; P2 = 70 min | Confirmed |
| Safety                                         | Adverse events reported                                                                                                                           | No adverse events                                                                                                                     | Confirmed |
| Trainer Acceptability                          | Post-T <sub>2</sub> Questionnaire:<br>- Major or minor deviations<br>- Protocol is clear<br>- Reasonable time available<br>- Issues with protocol | NO (or revise protocol)<br>YES (or revise protocol)<br>YES (or revise protocol)<br>NO (or revise protocol)                            | Confirmed |
